# Supplementary material for: In vitrogastrointestinal digestion and simulated colonic fermentation of pistachio nuts determine the bioaccessibility and biosynthesis of chronobiotics
Source: Royal Society of Chemistry journal article supplement (doi:10.1039/d0fo02708a), 2021-01-01
Supplement: d0fo02708a1.pdf [file d0fo02708a1.pdf]

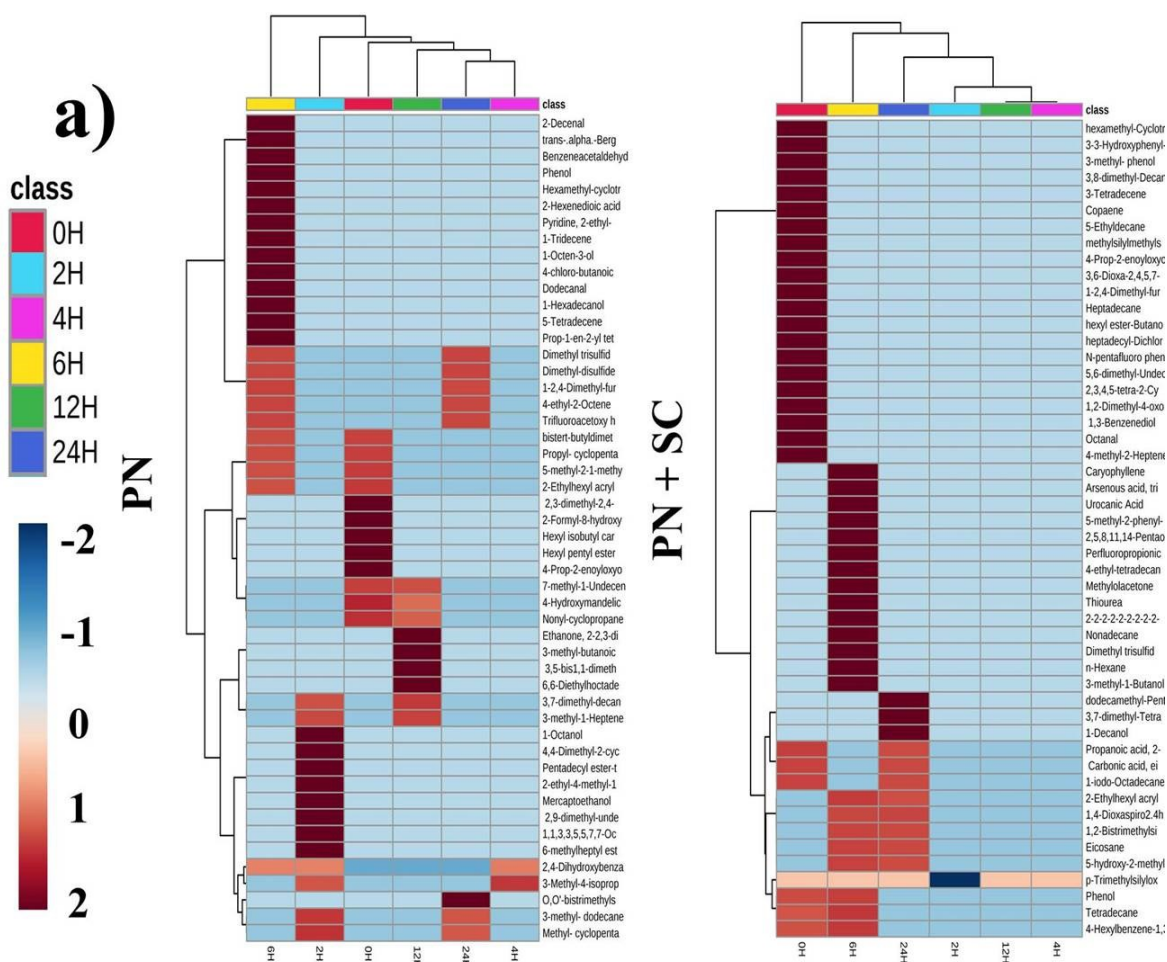

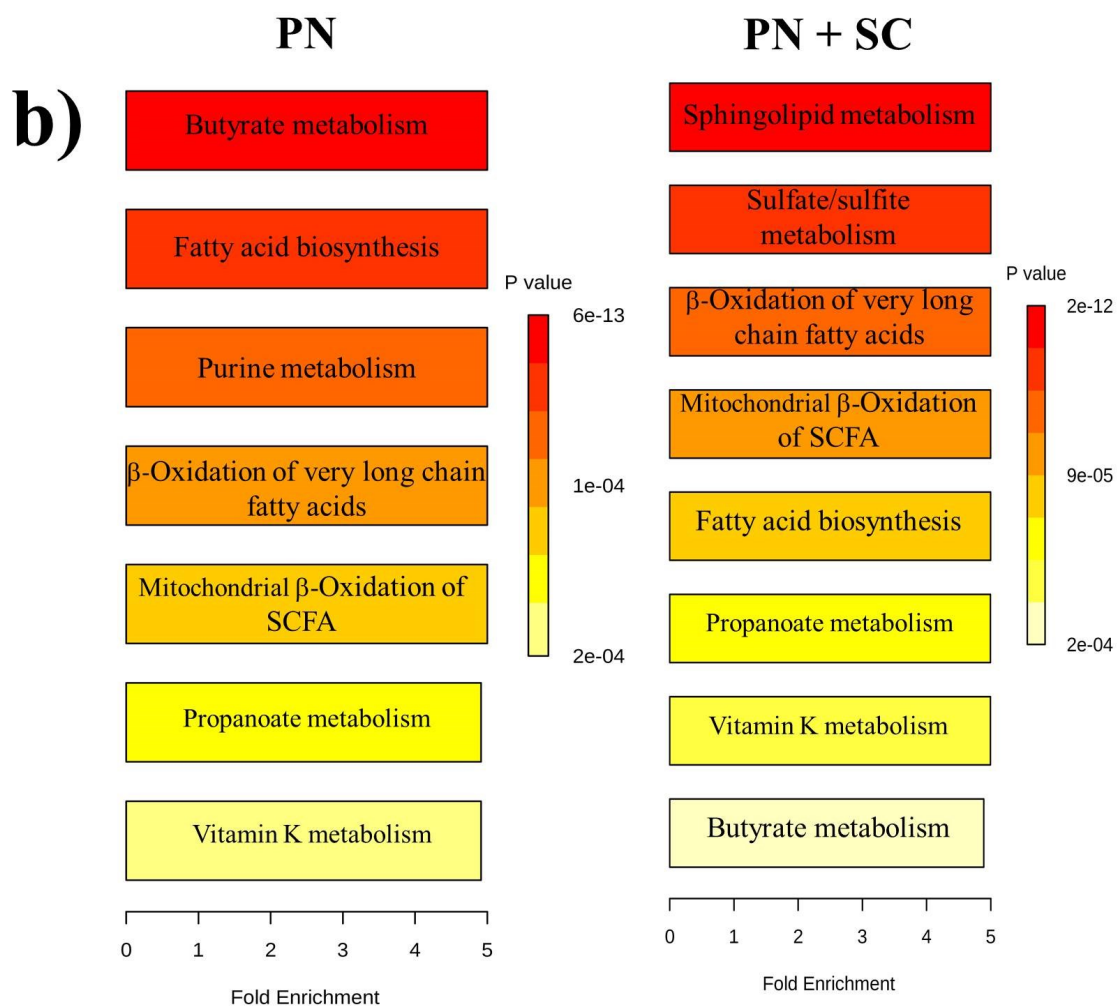

**Supplementary Figure 1.** Heatmap (a) and metabolic pathways (b) associated metabolites derived from *in vitro* fermentation of pistachio samples. Pistachio nuts (PN) with (PN+SC) or without (PN) seed coat (SC).
